# Supplementary material for: Interactions of rutin with the oxidovanadium(iv) cation. Anticancer improvement effects of glycosylated flavonoids
Source: Royal Society of Chemistry journal article supplement (doi:10.1039/c9nj01039d), 2019-01-01
Supplement: c9nj01039d1.pdf [file c9nj01039d1.pdf]

**Interactions of rutin with oxovanadium(IV) cation. Anticancer improvement effects of glycosylated flavonoids.**

Helen Goitia, Patricia Quispe, Luciana G. Naso, Valeria R. Martínez, Marilyn Rey, Alberto C. Rizzi, Evelina G. Ferrer, Patricia A.M. Williams\*

**New Journal of Chemistry**

**Supplementary material**

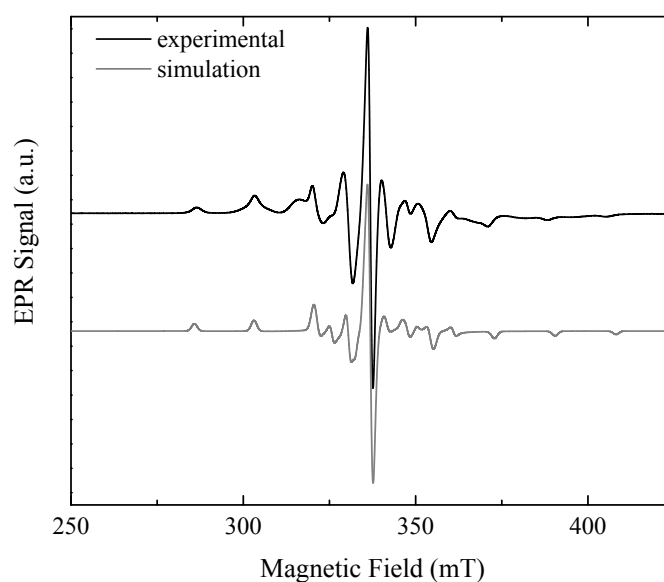

**Figure S1.** Experimental powder EPR spectrum of the  $\text{Na}_2[\text{VO}(\text{rut})(\text{OH})_2] \cdot 5\text{H}_2\text{O}$  complex obtained at 120 K (black) together with simulation (gray). Microwave frequency 9.4516 GHz. EPR parameters obtained by simulation:  $g_1 = 1.9869$ ,  $g_2 = 1.9763$ ,  $g_3 = 1.9477$ ;  $A_1 = 28.7 \times 10^{-4} \text{ cm}^{-1}$ ,  $A_2 = 51.7 \times 10^{-4} \text{ cm}^{-1}$ ;  $A_3 = 158.9 \times 10^{-4} \text{ cm}^{-1}$ .

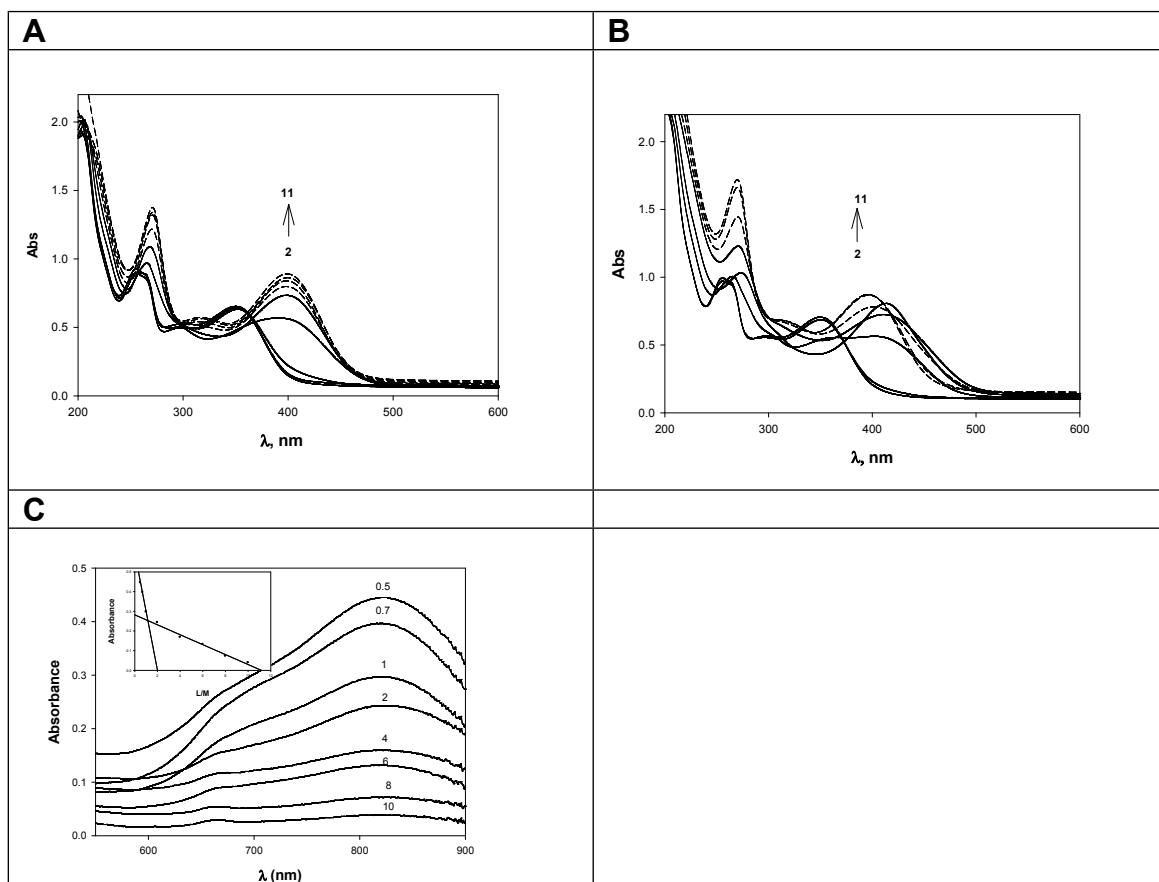

**Figure S2.** A) Spectra of rutin ( $4 \times 10^{-5}$  M), aqueous solutions, at different pH values. B) Spectra of aqueous solutions of  $5 \times 10^{-5}$  M rutin and  $2.5 \times 10^{-5}$  M  $\text{VOCl}_2$  at different pH values. C) UV-vis spectra of rutin ( $8 \times 10^{-3}$  M) DMSO with the addition of aqueous solutions of  $\text{VOCl}_2$  in ligand-to-metal ratios (L/M) from 10.0 to 0.7 (pH 7); nitrogen atmosphere. Inset: Spectrophotometric determination of  $\text{VOrut}$  complex stoichiometry at 820 nm.

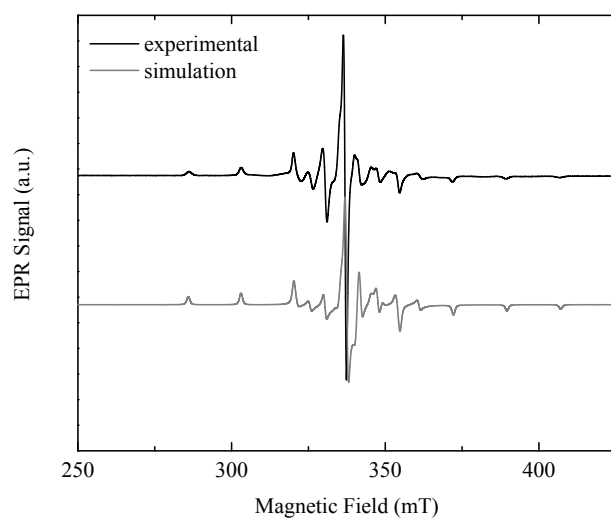

**Figure S3.** Frozen EPR spectra on DMSO solution of  $[\text{VO}(\text{rut})(\text{OH})_2]\text{Na}_2 \cdot 5\text{H}_2\text{O}$  complex (black) together with simulation (gray). Microwave frequency 9.46546 GHz. EPR parameters obtained by simulation:  $g_1 = 1.9873$ ,  $g_2 = 1.9780$ ,  $g_3 = 1.9510$ ;  $A_1 = 26.0 \times 10^{-4} \text{ cm}^{-1}$ ,  $A_2 = 52.0 \times 10^{-4} \text{ cm}^{-1}$ ;  $A_3 = 157.7 \times 10^{-4} \text{ cm}^{-1}$ .

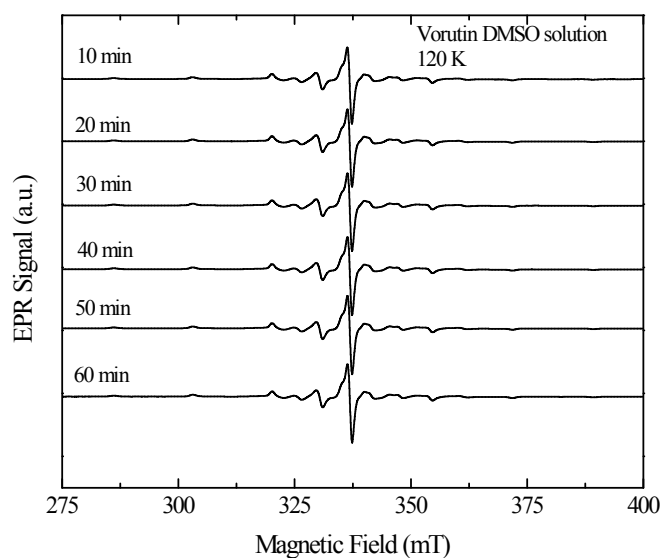

**Figure S4.** Frozen EPR spectra on DMSO solution of  $[\text{VO}(\text{rut})(\text{OH})_2]\text{Na}_2 \cdot 5\text{H}_2\text{O}$  recorded at 120K as a function of time.

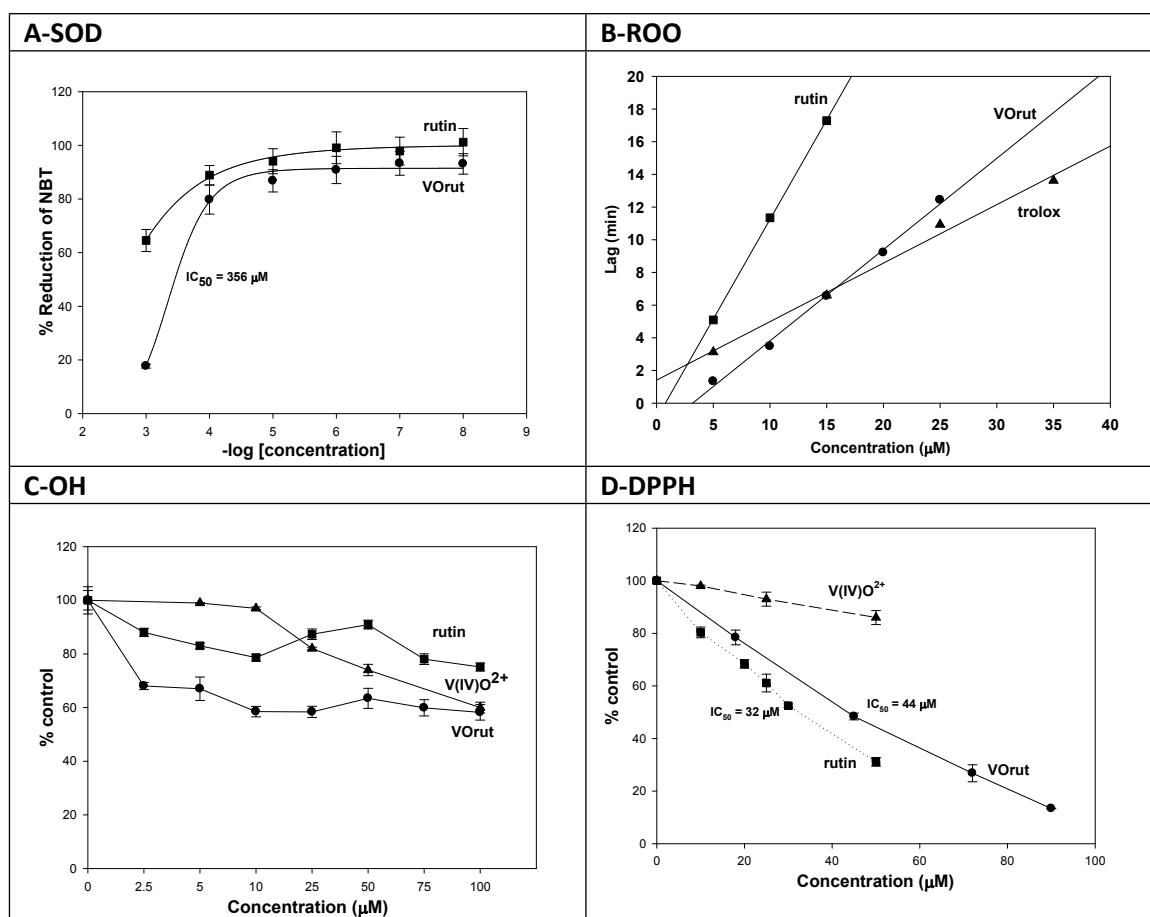

**Figure S5.** Effects of rutin, oxidovanadium(IV) cation and VOrut on: A) the reduction of nitroblue tetrazolium by the generated superoxide radical (phenazine methosulfate and reduced nicotinamide adenine dinucleotide system). B) peroxy radicals generated by the thermal decomposition of AAPH (2,2-azobis(2-amidinopropane) dihydrochloride); lag phase is the delay of the consumption of the spectrometric probe, pyranine, calculated as the time due to the consumption of peroxy radicals by the added compounds, before the consumption of pyranine started. C) extent of deoxyribose degradation by hydroxyl radical, measured with the thiobarbituric acid method. D) reduction of the concentration of 1,1-diphenyl-2-picrylhydrazyl radical. The values are expressed as the mean  $\pm$  the standard error of at least three independent experiments.

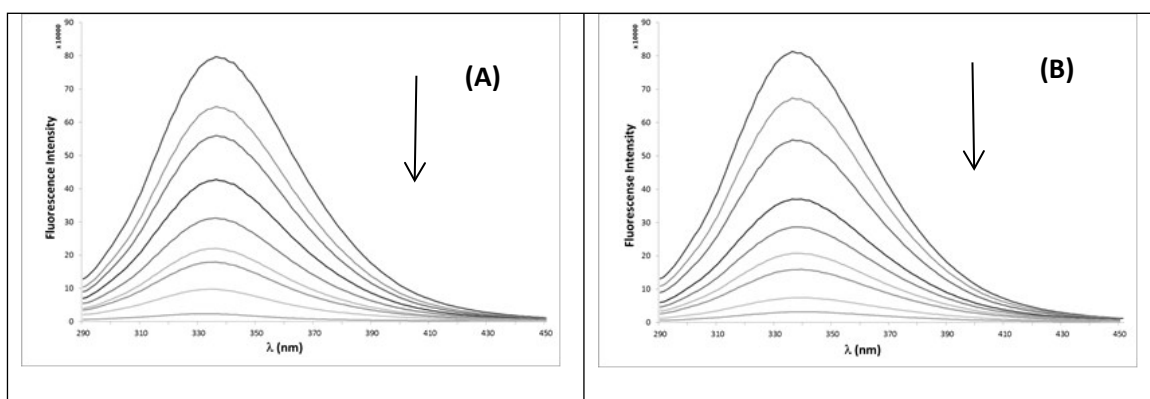

**Figure S6.** Fluorescence emission spectra of BSA (6  $\mu$ M) with successive addition of rutin (A) and VOrut (B) at different concentrations (0, 5, 10, 20, 30, 40, 50, 75, 100  $\mu$ M).

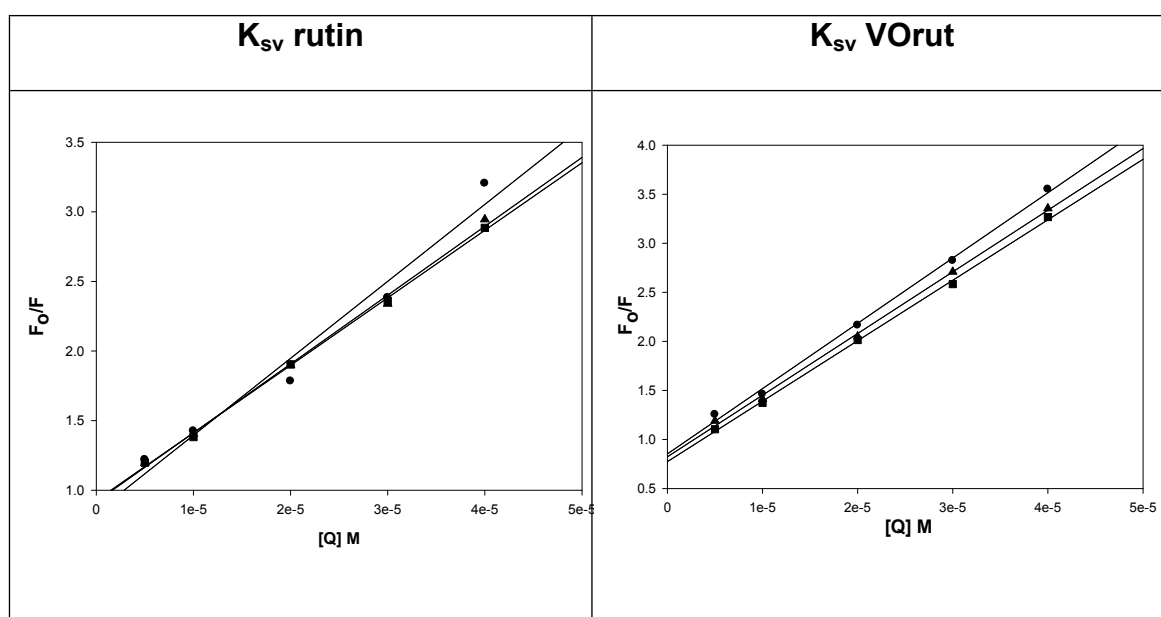

**Figure S7.** Plots of  $F_0/F$  vs  $[Q]$  for BSA with rutin and VOrut at different temperatures (( $\bullet$ ), 298 K; ( $\blacktriangle$ ), 303 K; ( $\blacksquare$ ), 310 K),  $\lambda_{ex}$  = 280 nm.

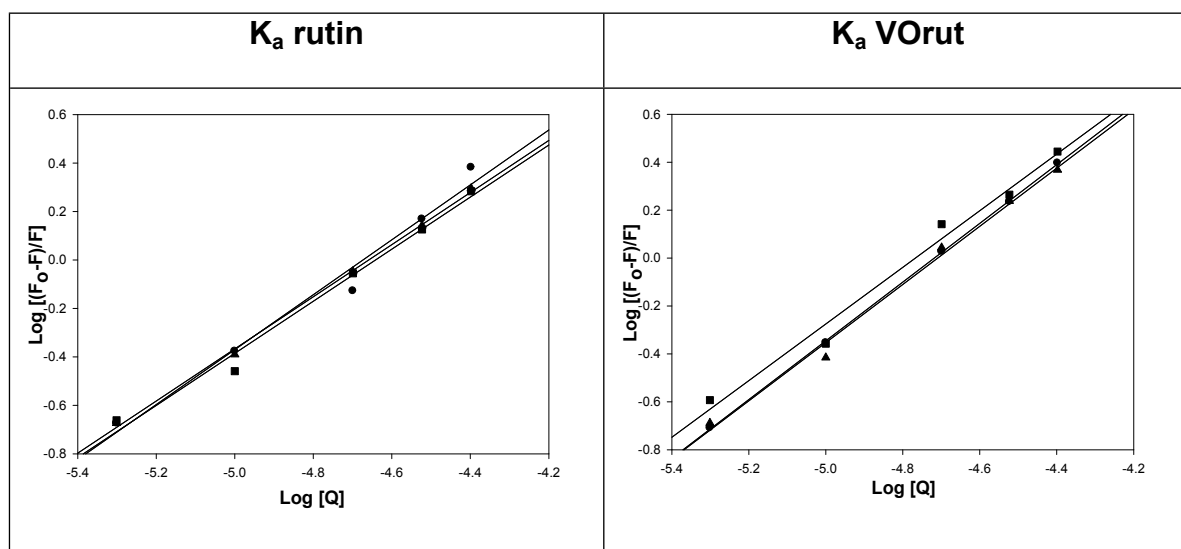

**Figure S8.** Plots of  $\log(F_0 - F)/F$  vs.  $\log [Q]$  for BSA with rutin and VOrut at different temperatures ((●), 298 K; (▲), 303 K; (■), 310 K),  $\lambda_{\text{ex}} = 280 \text{ nm}$

**Table S1** Assignment of the main bands of the infrared spectra of rutin and the oxidovanadium(IV) complex, VOrut (band positions in  $\text{cm}^{-1}$ )

| Assignments                      | $[\text{VO}(\text{OH})_2(\text{Rut})]\text{Na}_2$ | Rutin    |
|----------------------------------|---------------------------------------------------|----------|
| $\nu(\text{O-H})$                | 3414, br                                          | 3422, br |
| $\nu(\text{C=O})$                | 1650, vs                                          | 1656, s  |
| $\nu(\text{C=C})$                | 1577, s                                           | 1601, s  |
| $\nu(\text{C=C})$ , ring B       | 1485, s                                           | 1505, s  |
| $\delta_{\text{ip}}(\text{O-H})$ | 1361, s                                           | 1361, s  |
| $\delta(\text{C-O-H})$           | 1272, s                                           | 1296, s  |
| $\nu(\text{C-O-C})$              | 1205, m                                           | 1205, m  |
| $\nu(\text{C-O})_{\text{endo}}$  | 1013, w                                           | 1013, s  |
| $\nu(\text{V=O})$                | 920, w                                            |          |

Br, broad; s, strong; m, medium; w, weak; sh, shoulder.
